# Supplementary material
Source: PubMed Central journal article supplement (PMC6645814)
Supplement: ao7b01759_si_001.pdf [file ao7b01759_si_001.pdf]

# **Molecular insights into the membrane affinities of model hydrophobes**

Jianguo Li<sup>a,b</sup>, Roger W. Beuerman<sup>a,c,f,\*</sup>, Chandra S. Verma<sup>a,b,c,d,\*</sup>

<sup>a</sup> *Singapore Eye Research Institute, 11 Third Hospital Avenue, #06-00, Singapore 168751*

<sup>b</sup> *Bioinformatics Institute (A\*-STAR), 30 Biopolis Street, #07-01 Matrix, Singapore 138671*

<sup>c</sup> *School of Biological Sciences, Nanyang Technological University, 60 Nanyang Drive, Singapore 637551*

<sup>d</sup> *Department of Biological Sciences, National University of Singapore, 14 Science Drive 4, Singapore 117543*

<sup>e</sup> *Department of Ophthalmology, Yong Loo Lin School of Medicine, National University of Singapore, 5 Lower Kent Ridge Road, Singapore 119074*

<sup>f</sup> *Duke-NUS, SRP Neuroscience-Behavioural Disorders, Singapore*

\*Corresponding authors: Roger W. Beuerman (rwbeuerman@gmail.com)  
Chandra S. Verma (chandra@bii.a-star.edu.sg)

## Simulation details of each system

Table S1. Details of each conventional MD simulation system.

| Simulation                       | Box dimension     | No. lipids | No. water molecules | simulation time | Initial conformation |
|----------------------------------|-------------------|------------|---------------------|-----------------|----------------------|
| 16 mangostin                     | 7.5x7.5x7.5 nm    | 0          | 13450               | 150 ns          | in water (60 mM)     |
| 16 ciprofloxacin, (zwitterionic) | 7.5x7.5x7.5 nm    | 0          | 13527               | 150 ns          | in water (60 mM)     |
| 16 xanthone                      | 7.5x7.5x7.5 nm    | 0          | 13621               | 150 ns          | in water (60 mM)     |
| 16 tetracycline                  | 7.5x7.5x7.5 nm    | 0          | 13476               | 150 ns          | in water (60 mM)     |
| 16 alpha-mangostin               | 6.05x5.96x10.8 nm | 128        | 7256                | 1000 ns         | on membrane          |
| 16 ciprofloxacin, (neutral)      | 6.02x5.95x9.73 nm | 128        | 5841                | 1000 ns         | on membrane          |
| 16 ciprofloxacin, (neutral)      | 6.4x6.3x8.5 nm    | 128        | 5841                | 1000 ns         | in membrane          |

Table S2. Details of each umbrella sampling simulation system.

| simulation | compound                                 | temperature | No. windows | Size of each window | Simulation time of each window | No. water molecules | No. lipid molecules | Box length (nm) |
|------------|------------------------------------------|-------------|-------------|---------------------|--------------------------------|---------------------|---------------------|-----------------|
| 1          | 2 mangostin molecules                    | 310         | 24          | 0.15                | 50 ns                          | 11367               | 0                   | 7x7x7           |
| 2          | 2 ciprofloxacin molecules (zwitterionic) | 310         | 24          | 0.15                | 50 ns                          | 9097                | 0                   | 6.5x6.5x6.5     |
| 3          | 2 xanthone molecules                     | 310         | 24          | 0.15                | 50 ns                          | 7136                | 0                   | 6x6x6           |
| 4          | 2 tetracycline molecules                 | 310         | 24          | 0.15                | 50 ns                          | 9086                | 0                   | 6.5x6.5x6.5     |
| 5          | 1 mangostin molecule                     | 310         | 36          | 0.1 nm              | 400 ns                         | 3841                | 72                  | 4.5x4.5x10.2    |
| 6          | 1 mangostin molecule                     | 323         | 28          | 0.15 nm             | 400 ns                         | 3841                | 72                  | 4.5x4.5x10.2    |
| 7          | 1 Ciprofloxacin molecule (neutral)       | 310         | 28          | 0.15 nm             | 400 ns                         | 3267                | 72                  | 4.51x4.51x9.18  |
| 8          | 1 Ciprofloxacin molecule (neutral)       | 323         | 28          | 0.15 nm             | 400 ns                         | 3267                | 72                  | 4.51x4.51x9.18  |
| 9          | 1 xanthone molecule                      | 310         | 28          | 0.15 nm             | 200 ns                         | 3866                | 72                  | 4.5x4.5x10.2    |
| 10         | 1 tetracycline molecule                  | 310         | 28          | 0.15 nm             | 200 ns                         | 3935                | 72                  | 4.47x4.47x10.5  |

**Convergence of PMF calculations:** Convergence depends on sufficient sampling of the phase space. We believe our PMF simulations are converged because of the following. Firstly, the four compounds used in this study are small uncharged molecules. These compounds have relatively rigid conformations, resulting in significant sampling of the phase space during the simulations. It has been reported that the main error in PMF calculations of the interactions of small molecules with lipid bilayers arises from hidden free energy barriers which largely arise from the formation of lipid defects induced by charged molecules<sup>1</sup> and in such cases, complex reaction coordinates are required. For example, analogues of the arginine side chain are known to induce lipid defects filled with water molecules during the translocation of the molecules across the membrane, which, if not accounted for carefully, result in insufficient sampling. In contrast, the four compounds in our study are all uncharged and translocate across the membrane without significant membrane deformations. Additionally, the PMFs in our study were computed using umbrella sampling (US) simulations. In each umbrella window, the simulation was run for 200-400 ns, which, to our knowledge, is the longest time scale used in US simulations for calculating the free energies of such processes of solutes traversing membranes. In another work by Chris Neale and Pomès<sup>2</sup>, 200 ns windows were used to calculate the PMF of the translocation of a charged molecule, n-propylguanidinium, across the membrane. Other studies have generally used much shorter windows in US simulations of solute-bilayer systems. For example, Cramariuc et al. used 15 ns windows to calculate the PMF of the translocation of ciprofloxacin across the membrane<sup>3</sup>. Indeed, shorter time scale windows (50 ns) were also used to study even flexible molecules such as peptides translocating across the membrane<sup>4</sup>. Finally, we also calculated error bars in our study using the boot strap method, and they suggest convergence of the PMFs.

## Results

Figure S1. Number of hydrogen bonds during the aggregation of each compound.

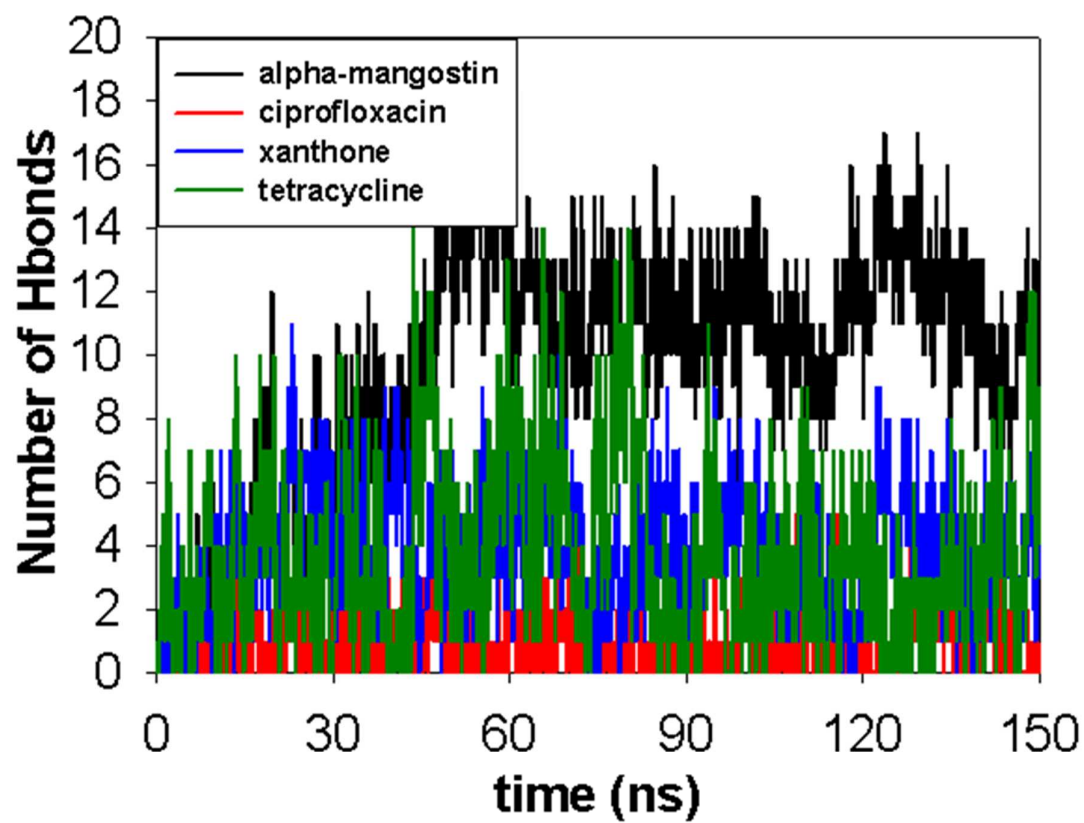

Figure S2. Temperature dependence of transfer free energies of alpha-mangostin and ciprofloxacin across a membrane

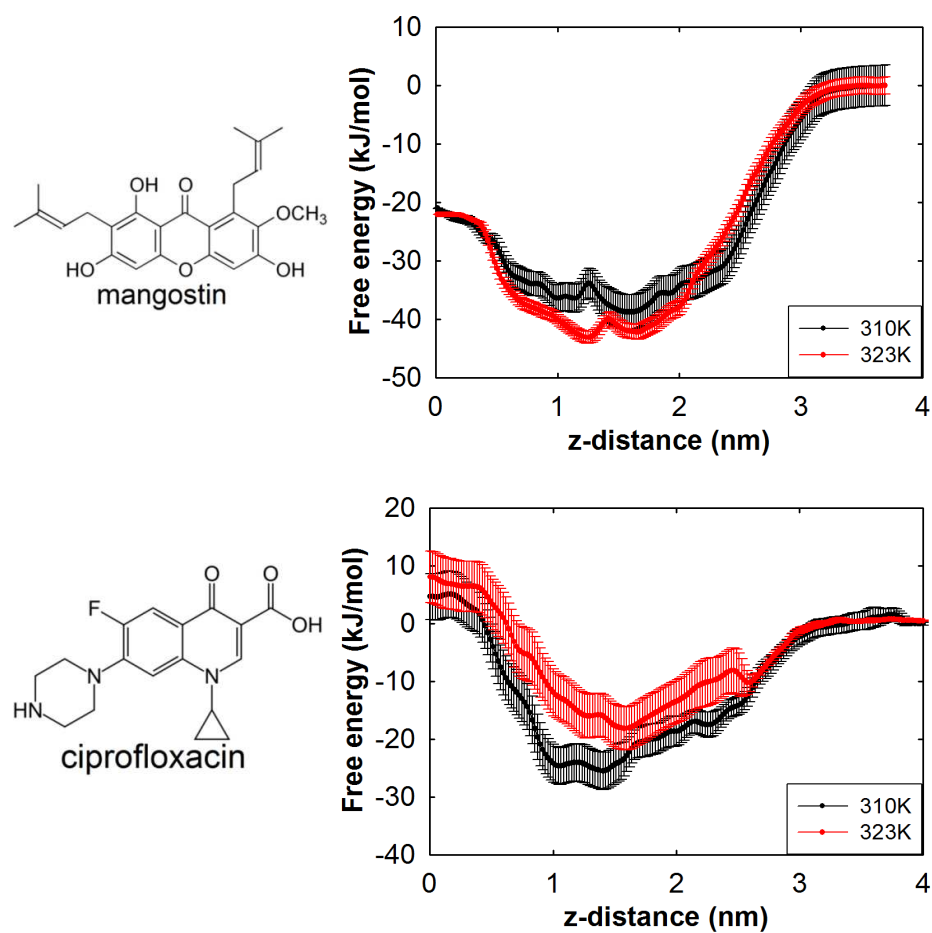

Figure S3. The orientation distributions of mangostin and ciprofloxacin at different distances from the membrane bilayer center. Two angles theta and phi were defined to characterize the orientation of each compound, with theta being the angle between the long axis of the molecule and the bilayer normal, and phi being the vector normal to the aromatic plane and the bilayer.

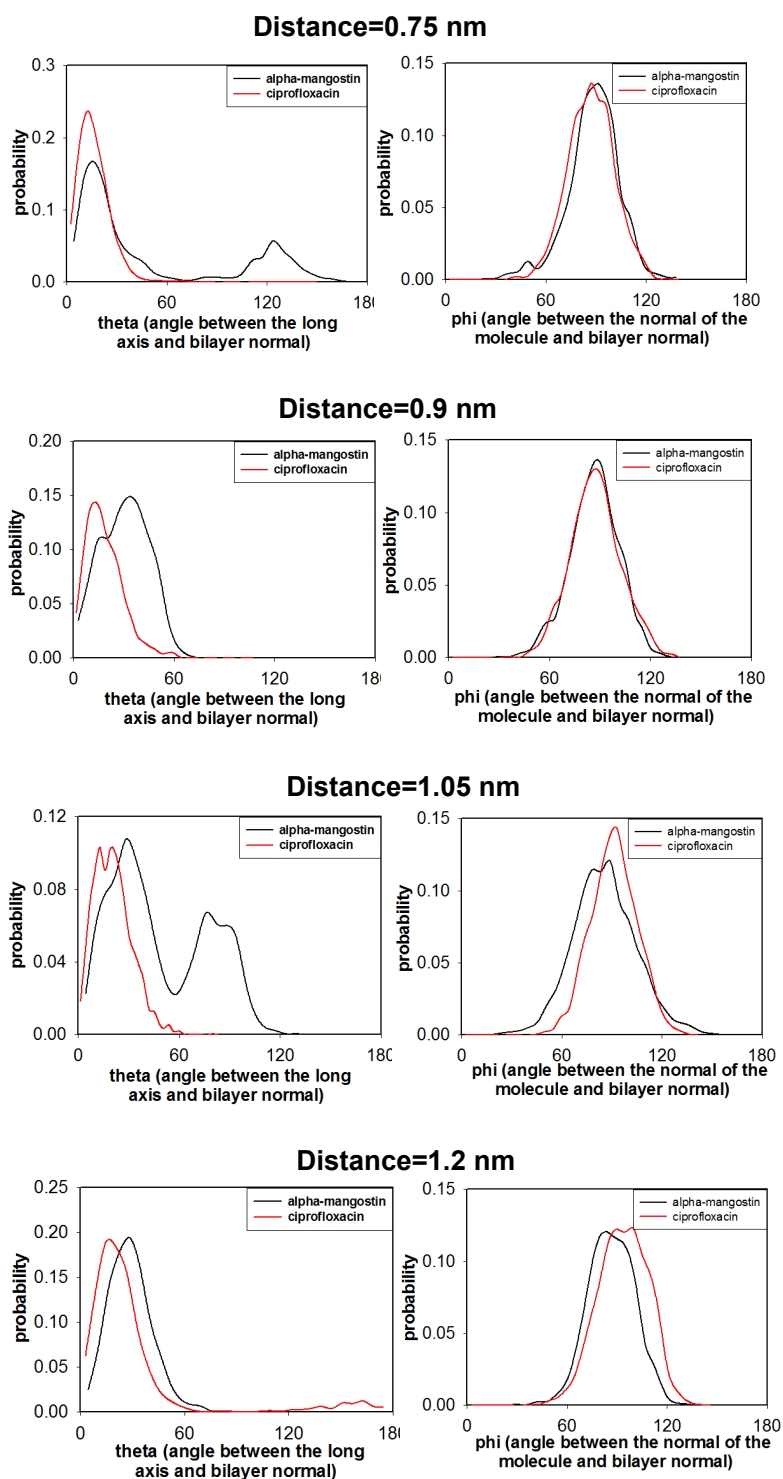

Figure S4. Area per lipid of the bacterial membrane in the presence of 16 mangostin and 16 ciprofloxacin molecules.

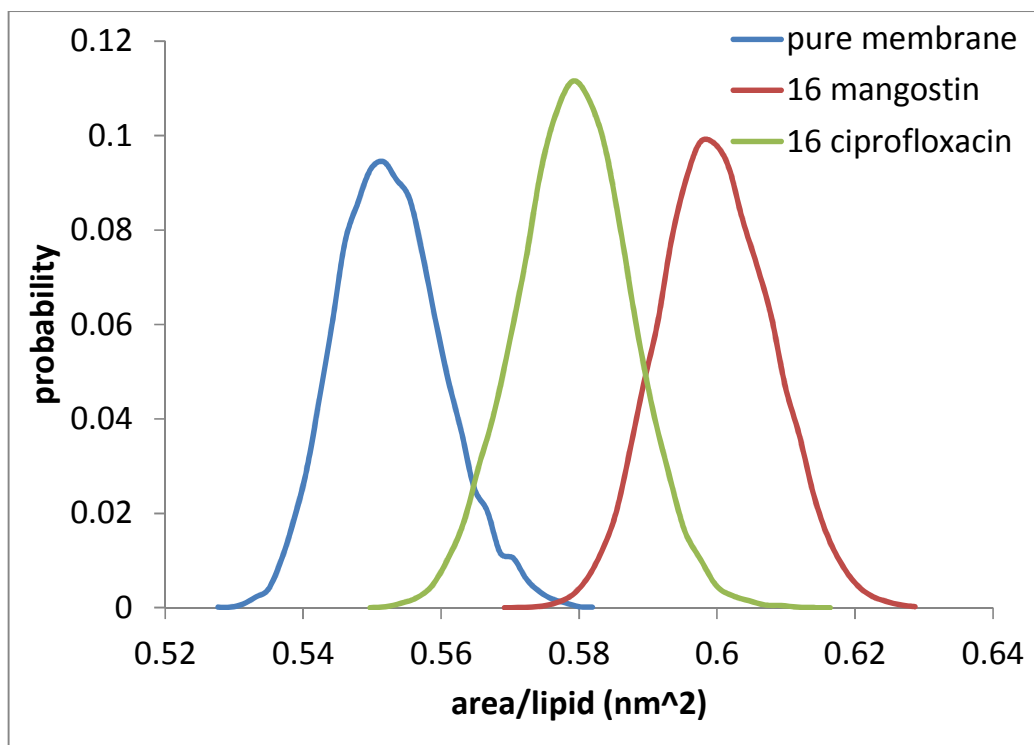

## References:

- (1) Neale, C.; Pomès, R. *Biochimica et Biophysica Acta (BBA) - Biomembranes* **2016**, 1858, 2539.
- (2) Neale, C.; Bennett, W. F. D.; Tieleman, D. P.; Pomès, R. *Journal of Chemical Theory and Computation* **2011**, 7, 4175.
- (3) Cramariuc, O.; Rog, T.; Javanainen, M.; Monticelli, L.; Polishchuk, A. V.; Vattulainen, I. *Biochimica et Biophysica Acta (BBA) - Biomembranes*.
- (4) Bennett, W. F. D.; Hong, C. K.; Wang, Y.; Tieleman, D. P. *Journal of Chemical Theory and Computation* **2016**, 12, 4524.
